# Supplementary material for: Transcriptome Analysis Reveals the AhR, Smad2/3, and HIF-1α Pathways as the Mechanism of Ochratoxin A Toxicity in Kidney Cells
Source: PubMed Central journal article supplement (PMC7999264; doi:10.3390/toxins13030190), 2021-03-06
Supplement: toxins-13-00190-s001.pdf [file toxins-13-00190-s001.pdf]

# Supplementary Materials: Transcriptome Analysis Reveals the AhR, Smad2/3, and HIF-1 $\alpha$ Pathways as the Mechanism of Ochratoxin A Toxicity in Kidney Cells

Min Cheol Pyo, In-Geol Choi and Kwang-Won Lee

Table S1. Human qPCR primer sequences used in the experiments.

| Origin         | Marker                                     | Sequence                                        |
|----------------|--------------------------------------------|-------------------------------------------------|
| Human          | AhR                                        | Sense 5'-TGG ACA AGG AAT TGA AGA AGC-3'         |
|                |                                            | Antisense 5'-AAA GGA GAG TTT TCT GGA GGA A-3'   |
|                | Smad2                                      | Sense 5'-ATG TCG TCC ATC TTG CCA TTC-3'         |
|                |                                            | Antisense 5'-AAC CGT CCT GTT TTC TTT AGC TT-3'  |
|                | Smad3                                      | Sense 5'-ATC TAC TGC CGC CTG TGG-3'             |
|                |                                            | Antisense 5'-TCT CTG GTA GTG GTA GGG ATT C-3'   |
|                | HIF-1 $\alpha$                             | Sense 5'-AGC GAC AGA TAA CAC GTT AGG GCT-3'     |
|                |                                            | Antisense 5'-AGC CTC ACC AAA CAG AGC AGG AAA-3' |
|                | E-cadherin                                 | Sense 5'-ATT TTT CCC TCG ACA CCC GAT-3'         |
|                |                                            | Antisense 5'-TCC CAG GCG TAG ACC AAG A-3'       |
|                | Fibronectin                                | Sense 5'-CTG GCC GAA AAT ACA TTG TAA A-3'       |
|                |                                            | Antisense 5'-CCA CAG TCG GGT CAG GAG-3'         |
|                | Bax                                        | Sense 5'-TCA GGA TGC GTC CAC CAA GAA G-3'       |
|                |                                            | Antisense 5'-TGT GTC CAC GGC GGC AAT CAT C-3'   |
|                | Bcl-2                                      | Sense 5'-ATG TGT GTG GAG AGC GTC AA-3'          |
|                |                                            | Antisense 5'-CAG GAG AAA TCA AAC AGA GGC-3'     |
|                | Caspase 3                                  | Sense 5'-GGA AGC GAA TCA ATG GAC TCT GG-3'      |
|                |                                            | Antisense 5'-GCA TCG ACA TCT GTA CCA GAC C-3'   |
|                | Caspase 9                                  | Sense 5'-GTT TGA GGA CCT TCG ACC AGC T-3'       |
|                |                                            | Antisense 5'-CAA CGT ACC AGG AGC CAC TCT T-3'   |
| KIM-1          | Sense 5'-GAA GTG GCT ACT GGT TCA TGG-3'    |                                                 |
|                | Antisense 5'-ACG ACT GTT CGA ACG AGC AC-3' |                                                 |
| $\beta$ -actin | Sense 5'-AGC GAG CAT CCC CCA AAG TT-3'     |                                                 |
|                | Antisense 5'-GGG CAC GAA GGC TCA TCA TT-3' |                                                 |
